# Supplementary material for: High Carriage of Extended-Spectrum, Beta Lactamase-Producing, and Colistin-Resistant Enterobacteriaceae in Tibetan Outpatients with Diarrhea
Source: MDPI journal article supplement (doi:10.3390/antibiotics11040508), 2022-04-11
Supplement: s1 [file s1]

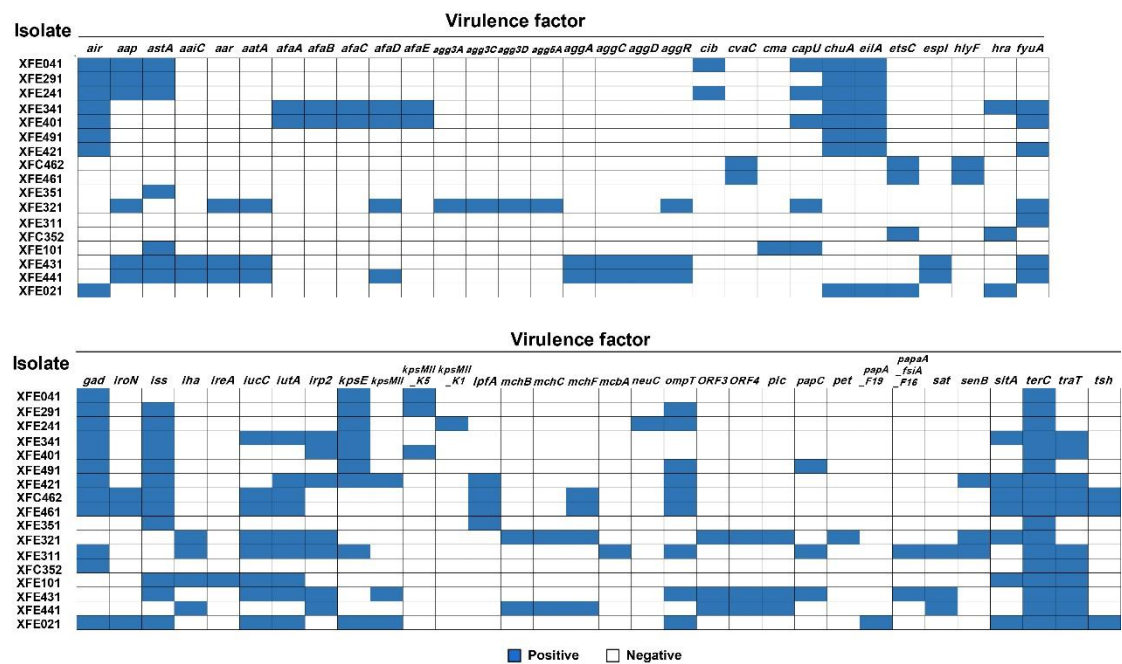

**Supplementary Figure S1.** Characteristics of the virulence genes predicted based on the sequences of the 17 sequenced *E. coli* isolates.
